# Supplementary material for: The Heart Knows Best: Baseline Cardiac Parasympathetic Activity as Guide to Transcutaneous Auricular Vagus Nerve Stimulation in Depression
Source: Research Square preprint supplement (doi:10.21203/rs.3.rs-5366818/v1), 2025-03-05
Supplement: Supplementary file 1 [file c3d745fb64a8f0c1f15b83be.docx]

**Supplementary Tables**

| **Supplementary Table 1A. Demographic Characteristics of Participants Split by Cardiac Parasympathetic Activity (CPA) Group.** CTRL=Control group, MDD= Major Depressive Disorder group. Bold values indicate significant results.nr=not reported. | | | | |
| --- | --- | --- | --- | --- |
|  | **N** | **CPA high**, N = 55*1* | **CPA low**, N = 54*1* | **p-value***2* |
| **Age** | 108 | 31.84 (11.90) | 37.72 (13.32) | **0.017 *** |
| **Sex** | 109 |  |  | >0.999 |
| female |  | 35 (64%) | 34 (63%) |  |
| male |  | 20 (36%) | 20 (37%) |  |
| **BMI** | 108 | 23.57 (3.14) | 24.27 (3.41) | 0.271 |
| **Group** | 109 |  |  | **<0.001 ***** |
| CTRL |  | 36 (65%) | 15 (28%) |  |
| MDD |  | 19 (35%) | 39 (72%) |  |
| **Smoker** | 109 |  |  | 0.273 |
| no |  | 42 (76%) | 44 (81%) |  |
| occasional |  | 7 (13%) | 2 (3.7%) |  |
| yes |  | 6 (11%) | 7 (13%) |  |
| unknown |  | 0 (0%) | 1 (1.9%) |  |
| **Contraception** | 108 |  |  | 0.496 |
| no |  | 20 (36%) | 21 (40%) |  |
| yes |  | 11 (20%) | 5 (9.4%) |  |
| postmenopausal |  | 3 (5.5%) | 4 (7.5%) |  |
| unknown |  | 1 (1.8%) | 3 (5.7%) |  |
| male |  | 20 (36%) | 20 (38%) |  |
| **Education** | 109 |  |  | 0.314 |
| 0- no degree |  | 0 (0%) | 2 (3.7%) |  |
| 1- primary school |  | 0 (0%) | 0 (0%) |  |
| 2- secondary school |  | 22 (40%) | 14 (26%) |  |
| 3- secondary education |  | 6 (11%) | 7 (13%) |  |
| 4- university degree |  | 27 (49%) | 29 (54%) |  |
| 5- doctoral degree |  | 0 (0%) | 1 (1.9%) |  |
| unknown |  | 0 (0%) | 1 (1.9%) |  |
| **unmedicated** | 108 |  |  | **0.039 *** |
| no |  | 14 (25%) | 26 (49%) |  |
| yes |  | 39 (71%) | 26 (49%) |  |
| nr |  | 2 (3.6%) | 1 (1.9%) |  |
| **antidepressants** | 109 |  |  | **0.001 **** |
| no |  | 45 (82%) | 26 (49%) |  |
| yes |  | 9 (16%) | 25 (47%) |  |
| nr |  | 2 (3.6%) | 2 (3.8%) |  |
| **Antidepressant type** |  |  |  | **0.1653** |
| SSRI/SNRI |  | 7(13%) | 21 (39%) |  |
| TCA |  | 0 (0%) | 3 (6%) |  |
| Other |  | 2 (4%) | 1(2%) |  |
| **CTQ Sum Score***4* | 107 | 36.76 (12.54) | 49.92 (19.26) | **<0.001 ***** |
| **PSS-10***4* | 108 | 15.15 (8.35) | 21.32 (8.70) | **<0.001 ***** |
| **MADRS***4* | 109 | 9.07 (12.48) | 19.44 (13.37) | **<0.001 ***** |
| **BDI-II***4* | 108 | 8.33 (11.43) | 19.33 (14.47) | **<0.001 ***** |
| *1* Mean (SD); n (%) | | | | |
| *2* Welch Two Sample t-test; Pearson’s Χ2 test | | | | |
| 3 P value derived from Chi-square test of MDD subgroup only | | | | |
| *4* Wilcoxon rank sum test | | | | |

| **Supplementary Table 1B. Demographic Characteristics of Control Participants split by CPA group. Bold values indicate significant results.nr=not reported.** | | | | |
| --- | --- | --- | --- | --- |
|  | **N** | **high**, N = 36*1* | **low**, N = 15*1* | **p-value***2* |
| **Sample characteristics** | | | | |
| **Age** | 51 | 29.64 (10.13) | 31.67 (12.45) | 0.582 |
| **Sex** | 51 |  |  | 0.895 |
| female |  | 24 (67%) | 9 (60%) |  |
| male |  | 12 (33%) | 6 (40%) |  |
| **BMI** | 51 | 23.35 (2.49) | 24.11 (2.84) | 0.373 |
| **Smoker** | 51 |  |  | 0.139 |
| no |  | 28 (78%) | 15 (100%) |  |
| occasional |  | 4 (11%) | 0 (0%) |  |
| yes |  | 4 (11%) | 0 (0%) |  |
| unknown |  | 0 (0%) | 0 (0%) |  |
| **Contraception** | 51 |  |  | 0.796 |
| no |  | 13 (36%) | 6 (40%) |  |
| yes |  | 9 (25%) | 2 (13%) |  |
| postmenopausal |  | 1 (2.8%) | 0 (0%) |  |
| unknown |  | 1 (2.8%) | 1 (6.7%) |  |
| male |  | 12 (33%) | 6 (40%) |  |
| **Education** | 51 |  |  | 0.324 |
| 0- no degree |  | 0 (0%) | 0 (0%) |  |
| 1- primary school |  | 0 (0%) | 0 (0%) |  |
| 2- secondary school |  | 16 (44%) | 4 (27%) |  |
| 3- secondary education |  | 4 (11%) | 2 (13%) |  |
| 4- university degree |  | 16 (44%) | 8 (53%) |  |
| 5- doctoral degree |  | 0 (0%) | 1 (6.7%) |  |
| unknown |  | 0 (0%) | 0 (0%) |  |
| **Unmedicated** | 51 |  |  | 0.618 |
| no |  | 3 (8.3%) | 0 (0%) |  |
| yes |  | 33 (92%) | 15 (100%) |  |
| nr |  | 0 (0%) | 0 (0%) |  |
| **Antidepressants** | 51 |  |  |  |
| no |  | 36 (100%) | 15(100%) | na |
| yes |  | na | na |  |
| nr |  | na | na |  |
| **Questionnaires** | | | | |
| **BDI** |  | 0(8) | 0(9) | 0.47 |
| **MADRS** |  | 0(7) | 1(9) | 0.265 |
| **CTQ Sum Score** | 50 | 32.77 (10.09) | 37.53 (11.07) | **0.033 *** |
| **PSS 10** | 51 | 10.03 (4.44) | 11.20 (5.31) | 0.527 |
| **Baseline comparison (sham)** | | | | |
| **Positive Emotions (Composite Score)** | 50 | 305.47 (47.65) | 283.08 (63.28) | 0.271 |
| **Negative Emotions (Composite Score)** | 50 | 55.87 (54.73) | 72.67 (61.97) | 0.396 |
| **Stress (%)** | 50 | 16.88 (20.42) | 16.04 (17.44) | 0.983 |
| **Median TNF-alpha in pg/mL (range)** | 37 | 0.61 (1.79) | 1 (1.44) | 0.667 |
| **Median IL-6 in pg/mL( range)** | 40 | 2.27 (55.07) | 2.78 (9.26) | 0.510 |
| **Mean HR** | 49 | 65.48 (6.82) | 74.28 (10.64) | **0.004** |
| **RMSSD in ms** | 49 | 65.08 (24.46) | 29.41 (8.20) | **<0.001** |
| **HF-HRV (FFT)** | 49 | 1,868.13 (1,518.74) | 394.95 (237.60) | **<0.001** |
| **LF-HRV (FFT)** | 49 | 2,722.46 (3,805.84) | 982.43 (664.97) | **0.008** |
| *1* Mean (SD); n (%) | | | | |
| *2* Welch Two Sample t-test; Pearson’s Chi-squared test | | | | |

| **Supplementary Table 1C. Demographic Characteristics of Participants with MDD split by CPA group. Bold values indicate significant results.nr=not reported.** | | | | |
| --- | --- | --- | --- | --- |
|  | **N** | **high**, N = 19*1* | **low**, N = 39*1* | **p-value***2* |
| **Sample characteristics** | | | | |
| **Age** | 57 | 36.00 (14.04) | 40.11 (13.04) | 0.294 |
| **Sex** | 58 |  |  | 0.866 |
| female |  | 11 (58%) | 25 (64%) |  |
| male |  | 8 (42%) | 14 (36%) |  |
| **BMI** | 57 | 24.00 (4.14) | 24.33 (3.64) | 0.767 |
| **Smoker** | 58 |  |  | 0.453 |
| no |  | 14 (74%) | 29 (74%) |  |
| occasional |  | 3 (16%) | 2 (5.1%) |  |
| yes |  | 2 (11%) | 7 (18%) |  |
| unknown |  | 0 (0%) | 1 (2.6%) |  |
| **Contraception** | 57 |  |  | 0.876 |
| no |  | 7 (37%) | 15 (39%) |  |
| yes |  | 2 (11%) | 3 (7.9%) |  |
| postmenopausal |  | 2 (11%) | 4 (11%) |  |
| unknown |  | 0 (0%) | 2 (5.3%) |  |
| male |  | 8 (42%) | 14 (37%) |  |
| **Education** | 58 |  |  | 0.787 |
| 0- no degree |  | 0 (0%) | 2 (5.1%) |  |
| 1- primary school |  | 0 (0%) | 0 (0%) |  |
| 2- secondary school |  | 6 (32%) | 10 (26%) |  |
| 3- secondary education |  | 2 (11%) | 5 (13%) |  |
| 4- university degree |  | 11 (58%) | 21 (54%) |  |
| 5- doctoral degree |  | 0 (0%) | 0 (0%) |  |
| unknown |  | 0 (0%) | 1 (2.6%) |  |
| **Unmedicated** | 57 |  |  | 0.418 |
| no |  | 11 (58%) | 26 (68%) |  |
| yes |  | 6 (32%) | 11 (29%) |  |
| nr |  | 2 (11%) | 1 (2.6%) |  |
| **Antidepressants** | 57 |  |  | 0.229 |
| no |  | 9 (47%) | 11 (29%) |  |
| yes |  | 8 (42%) | 25 (66%) |  |
| nr |  | 2 (11%) | 2 (5.3%) |  |
| **Questionnaires** | | | | |
| **BDI** | 57 | 22.78 (8.29) | 26.08 (11.02) | 0.192 |
| **MADRS** | 58 | 24.53 (8.76) | 26.21 (8.78) | 0.613 |
| **CTQ Sum Score** | 57 | 44.11 (13.52) | 54.82 (19.70) | **0.048 *** |
| **PSS 10** | 57 | 24.84 (4.39) | 25.32 (6.15) | 0.696 |
| **Baseline comparison (sham)** | | | | |
| **Positive Emotions (Composite Score)** | 54 | 187.88 (51.34) | 189.24 (64.46) | 0.894 |
| **Negative Emotions (Composite Score)** | 54 | 189.25 (87.44) | 188.50 (100.40) | 0.733 |
| **Stress (%)** | 54 | 51.56 (22.73) | 45.34 (23.68) | 0.251 |
| **Median TNF-alpha in pg/mL (range)** | | 0.28(0.7) | 0.35(5.39) | 0.685 |
| **Median IL-6 in pg/mL( range)** | 49 | 2.76 (9.37) | 2.8 (19.79) | 0.837 |
| **Mean HR** | 48 | 65.90 (7.80) | 70.99 (12.61) | 0.17 |
| **RMSSD in ms** | 48 | 77.20 (35.19) | 25.74 (8.76) | **<0.001** |
| **HF-HRV (FFT)** | 48 | 2,332.84 (1,578.31) | 272.68 (221.99) | **<0.001** |
| **LF-HRV (FFT)** | 48 | 2,263.97 (1,257.26) | 701.83 (729.83) | **<0.001** |
| *1* Mean (SD); n (%) | | | | |
| *2* Welch Two Sample t-test; Pearson’s Chi-squared test | | | | |

**Supplementary Table 2. Analysis for MDD versus healthy controls**

| **A. Emotions** |  | |  | |  | |  | |  |  |  |
| --- | --- | --- | --- | --- | --- | --- | --- | --- | --- | --- | --- |
| **Stress** | NumDF | DenDF | | F | | Pr(>F) | | Significance without TCA | | |
| Intervention | 1.000 | 509.710 | | 0.621 | | 0.431 | | 0.116 | | |
| Group | 1.000 | 100.710 | | 45.641 | | **0.000** | | **0.000** | | |
| Timepoint | 2.000 | 493.430 | | 128.167 | | **0.000** | | **0.000** | | |
| Sex | 1.000 | 99.540 | | 0.356 | | 0.552 | | 0.794 | | |
| Age | 1.000 | 100.050 | | 1.750 | | 0.189 | | 0.193 | | |
| Testday | 1.000 | 517.750 | | 2.612 | | 0.107 | | 0.460 | | |
| Stimulation Intensity | 1.000 | 590.820 | | 0.291 | | 0.590 | | 0.218 | | |
| Intervention:Group | 1.000 | 504.360 | | 1.256 | | 0.263 | | 0.673 | | |
| Interverntion:Timepoint | 2.000 | 493.430 | | 0.867 | | 0.421 | | 0.394 | | |
| Group:Timepoint | 2.000 | 493.430 | | 11.163 | | **0.000** | | **0.000** | | |
| Intervention:Group:Timepoint | 2.000 | 493.430 | | 0.363 | | 0.696 | | 0.644 | | |
|  |  |  | |  | |  | |  | | |
| **Negative Emotions** | NumDF | DenDF | | F | | Pr(>F) | | Significance without TCA | | |
| Intervention | 1.000 | 504.950 | | 1.745 | | 0.187 | | 0.591 | | |
| Group | 1.000 | 101.830 | | 72.534 | | **0.000** | | **0.000** | | |
| Timepoint | 2.000 | 494.550 | | 106.447 | | **0.000** | | **0.000** | | |
| Sex | 1.000 | 101.060 | | 2.790 | | 0.098 | | 0.158 | | |
| Age | 1.000 | 101.400 | | 2.415 | | 0.123 | | 0.170 | | |
| Testday | 1.000 | 510.600 | | 2.908 | | 0.089 | | 0.381 | | |
| Stimulation Intensity | 1.000 | 589.390 | | 0.020 | | 0.888 | | 0.391 | | |
| Intervention:Group | 1.000 | 501.430 | | 0.087 | | 0.768 | | 0.718 | | |
| Interverntion:Timepoint | 2.000 | 494.550 | | 1.570 | | 0.209 | | 0.219 | | |
| Group:Timepoint | 2.000 | 494.550 | | 9.764 | | **0.000** | | **0.000** | | |
| Intervention:Group:Timepoint | 2.000 | 494.550 | | 0.128 | | 0.880 | | 0.870 | | |
|  |  |  | |  | |  | |  | | |
| **Positive Emotions** | NumDF | DenDF | | F | | Pr(>F) | | Significance without TCA | | |
| Intervention | 1.000 | 505.440 | | 1.178 | | 0.278 | | 0.837 | | |
| Group | 1.000 | 103.480 | | 112.511 | | **0.000** | | **0.000** | | |
| Timepoint | 2.000 | 496.200 | | 10.242 | | **0.000** | | **0.000** | | |
| Sex | 1.000 | 102.780 | | 0.570 | | 0.452 | | 0.624 | | |
| Age | 1.000 | 103.090 | | 1.025 | | 0.314 | | 0.399 | | |
| Testday | 1.000 | 510.550 | | 12.641 | | **0.000** | | **0.010** | | |
| Stimulation Intensity | 1.000 | 584.140 | | 1.500 | | 0.221 | | 0.691 | | |
| Intervention:Group | 1.000 | 502.310 | | 0.339 | | 0.561 | | 0.871 | | |
| Interverntion:Timepoint | 2.000 | 496.200 | | 0.163 | | 0.849 | | 0.878 | | |
| Group:Timepoint | 2.000 | 496.200 | | 0.011 | | 0.989 | | 0.953 | | |
| Intervention:Group:Timepoint | 2.000 | 496.200 | | 2.003 | | 0.136 | | 0.079 | | |

| **B. Heart Rate Variability** | | |  | |  | |  | |  |  |  | |
| --- | --- | --- | --- | --- | --- | --- | --- | --- | --- | --- | --- | --- |
| **HR** | NumDF | DenDF | | F | | Pr(>F) | | Significance without TCA | | | |
| Intervention | 1.000 | 455.300 | | 0.355 | | 0.552 | | 0.478 | | | |
| Group | 1.000 | 101.610 | | 1.027 | | 0.313 | | 0.434 | | | |
| Timepoint | 2.000 | 444.250 | | 57.207 | | **0.000** | | **0.000** | | | |
| Sex | 1.000 | 101.280 | | 11.586 | | **0.001** | | **0.000** | | | |
| Age | 1.000 | 101.820 | | 8.857 | | **0.004** | | **0.002** | | | |
| Testday | 1.000 | 460.580 | | 0.123 | | 0.726 | | 0.621 | | | |
| Stimulation Intensity | 1.000 | 512.020 | | 3.712 | | 0.055 | | **0.039** | | | |
| Intervention:Group | 1.000 | 453.410 | | 0.455 | | 0.501 | | 0.440 | | | |
| Interverntion:Timepoint | 2.000 | 444.150 | | 0.466 | | 0.628 | | 0.654 | | | |
| Group:Timepoint | 2.000 | 444.240 | | 1.080 | | 0.340 | | 0.439 | | | |
| Intervention:Group:Timepoint | 2.000 | 444.150 | | 0.419 | | 0.658 | | 0.663 | | | |
|  |  |  | |  | |  | |  | | | |
| **RMSSD** | NumDF | DenDF | | F | | Pr(>F) | | Significance without TCA | | | |
| Intervention | 1.000 | 455.740 | | 1.746 | | 0.187 | | 0.358 | | | |
| Group | 1.000 | 101.170 | | 6.179 | | **0.015** | | **0.027** | | | |
| Timepoint | 2.000 | 443.880 | | 26.282 | | **0.000** | | **0.000** | | | |
| Sex | 1.000 | 100.820 | | 1.269 | | 0.263 | | 0.559 | | | |
| Age | 1.000 | 101.400 | | 1.112 | | 0.294 | | 0.493 | | | |
| Testday | 1.000 | 461.350 | | 0.113 | | 0.737 | | 0.923 | | | |
| Stimulation Intensity | 1.000 | 515.740 | | 0.019 | | 0.890 | | 0.801 | | | |
| Intervention:Group | 1.000 | 453.710 | | 0.058 | | 0.809 | | 0.918 | | | |
| Interverntion:Timepoint | 2.000 | 443.770 | | 1.884 | | 0.153 | | 0.185 | | | |
| Group:Timepoint | 2.000 | 443.870 | | 2.652 | | 0.072 | | 0.094 | | | |
| Intervention:Group:Timepoint | 2.000 | 443.770 | | 0.104 | | 0.901 | | 0.929 | | | |
|  |  |  | |  | |  | |  | | | |
| **HF-HRV** | NumDF | DenDF | | F | | Pr(>F) | | Significance without TCA | | | |
| Intervention | 1.000 | 460.280 | | 0.587 | | 0.444 | | 0.617 | | | |
| Group | 1.000 | 101.440 | | 7.126 | | **0.009** | | **0.017** | | | |
| Timepoint | 2.000 | 444.480 | | 14.347 | | **0.000** | | **0.000** | | | |
| Sex | 1.000 | 100.980 | | 4.936 | | **0.029** | | 0.090 | | | |
| Age | 1.000 | 101.760 | | 4.469 | | **0.037** | | 0.073 | | | |
| Testday | 1.000 | 467.360 | | 1.597 | | 0.207 | | 0.352 | | | |
| Stimulation Intensity | 1.000 | 532.500 | | 0.228 | | 0.633 | | 0.841 | | | |
| Intervention:Group | 1.000 | 457.590 | | 0.053 | | 0.819 | | 0.997 | | | |
| Interverntion:Timepoint | 2.000 | 444.320 | | 0.348 | | 0.706 | | 0.782 | | | |
| Group:Timepoint | 2.000 | 444.460 | | 1.963 | | 0.142 | | 0.198 | | | |
| Intervention:Group:Timepoint | 2.000 | 444.330 | | 0.631 | | 0.533 | | 0.578 | | | |
|  |  |  | |  | |  | |  | | | |
| **LF-HRV** | NumDF | DenDF | | F | | Pr(>F) | | Significance without TCA | | | |
| Intervention | 1.000 | 468.800 | | 1.277 | | 0.259 | | 0.381 | | | |
| Group | 1.000 | 100.770 | | 4.557 | | **0.035** | | **0.048** | | | |
| Timepoint | 2.000 | 444.740 | | 23.856 | | **0.000** | | **0.000** | | | |
| Sex | 1.000 | 100.120 | | 0.289 | | 0.592 | | 0.230 | | | |
| Age | 1.000 | 101.310 | | 12.009 | | **0.001** | | **0.001** | | | |
| Testday | 1.000 | 478.270 | | 0.534 | | 0.465 | | 0.668 | | | |
| Stimulation Intensity | 1.000 | 542.990 | | 0.418 | | 0.518 | | 0.722 | | | |
| Intervention:Group | 1.000 | 464.760 | | 1.436 | | 0.231 | | 0.167 | | | |
| Interverntion:Timepoint | 2.000 | 444.480 | | 3.276 | | **0.039** | | **0.044** | | | |
| Group:Timepoint | 2.000 | 444.710 | | 0.725 | | 0.485 | | 0.391 | | | |
| Intervention:Group:Timepoint | 2.000 | 444.480 | | 0.912 | | 0.403 | | 0.421 | | | |
|  |  |  | |  | |  | |  | | | |
| **LF/HF ratio** | **NumDF** | **DenDF** | | **F** | | **Pr(>F)** | |  | | | |
| Intervention | 1.000 | 469.840 | | 0.194 | | 0.660 | | 0.701 | | | |
| Group | 1.000 | 95.360 | | 1.746 | | 0.190 | | 0.291 | | | |
| Timepoint | 2.000 | 439.880 | | 2.093 | | 0.125 | | 0.213 | | | |
| Sex | 1.000 | 94.650 | | 13.532 | | 0.000 | | **0.001** | | | |
| Age | 1.000 | 96.020 | | 0.996 | | 0.321 | | 0.173 | | | |
| Testday | 1.000 | 480.690 | | 0.277 | | 0.599 | | 0.589 | | | |
| Stimulation Intensity | 1.000 | 529.680 | | 0.050 | | 0.823 | | 0.844 | | | |
| Intervention:Group | 1.000 | 464.840 | | 1.980 | | 0.160 | | 0.155 | | | |
| Interverntion:Timepoint | 2.000 | 439.530 | | 1.575 | | 0.208 | | 0.182 | | | |
| Group:Timepoint | 2.000 | 439.850 | | 0.310 | | 0.733 | | 0.879 | | | |
| Intervention:Group:Timepoint | 2.000 | 439.540 | | 1.963 | | 0.142 | | 0.192 | | | |

| **C: Inflammation** |  | |  | |  | |  | |  |  |  | |
| --- | --- | --- | --- | --- | --- | --- | --- | --- | --- | --- | --- | --- |
| **IL6** | NumDF | DenDF | | F value | | Pr(>F) | | Significance without TCA | | | |
| Intervention | 1.000 | 240.470 | | 1.120 | | 0.291 | | 0.340 | | | |
| Group | 1.000 | 82.062 | | 0.005 | | 0.942 | | 0.970 | | | |
| Timepoint | 1.000 | 237.350 | | 2.500 | | 0.115 | | 0.126 | | | |
| Sex | 1.000 | 81.725 | | 0.775 | | 0.381 | | 0.388 | | | |
| Age | 1.000 | 82.404 | | 0.154 | | 0.696 | | 0.780 | | | |
| Testday | 1.000 | 242.535 | | 1.107 | | 0.294 | | 0.362 | | | |
| Stimulation Intensity | 1.000 | 273.977 | | 1.083 | | 0.299 | | 0.365 | | | |
| Intervention:Group | 1.000 | 239.317 | | 3.044 | | 0.082 | | 0.105 | | | |
| Interverntion:Timepoint | 1.000 | 237.347 | | 0.057 | | 0.812 | | 0.652 | | | |
| Group:Timepoint | 1.000 | 237.372 | | 0.000 | | 0.989 | | 0.974 | | | |
| Intervention:Group:Timepoint | 1.000 | 237.369 | | 0.869 | | 0.352 | | 0.257 | | | |
|  |  |  | |  | |  | |  | | | |
| **TNF-alpha** | NumDF | DenDF | | F value | | Pr(>F) | | Significance without TCA | | | |
| Intervention | 1.000 | 231.112 | | 0.574 | | 0.450 | | 0.515 | | | |
| Group | 1.000 | 79.080 | | 3.871 | | 0.05262 . | | 0.052 | | | |
| Timepoint | 1.000 | 226.272 | | 0.932 | | 0.335 | | 0.384 | | | |
| Sex | 1.000 | 78.214 | | 0.004 | | 0.953 | | 0.937 | | | |
| Age | 1.000 | 79.291 | | 2.125 | | 0.149 | | 0.140 | | | |
| Testday | 1.000 | 233.186 | | 0.104 | | 0.747 | | 0.825 | | | |
| Stimulation Intensity | 1.000 | 281.579 | | 0.568 | | 0.452 | | 0.525 | | | |
| Intervention:Group | 1.000 | 230.015 | | 0.010 | | 0.922 | | 0.880 | | | |
| Interverntion:Timepoint | 1.000 | 226.250 | | 0.089 | | 0.765 | | 0.824 | | | |
| Group:Timepoint | 1.000 | 226.228 | | 1.272 | | 0.261 | | 0.248 | | | |
| Intervention:Group:Timepoint | 1.000 | 226.263 | | 0.370 | | 0.544 | | 0.513 | | | |

| **Supplementary Table 3A. Fixed Effects of lmer for Emotions in Type-III Anova Table.** Significance Values: ***<0.001, **<0.01, *<0.05, .<0.1**.** Formula: Emotion [transformed] ~ Condition*CPA*Timepoint+ Group+ Sex+Age+ Testday+ Intensity+(1| ID)**.** Significance indicates the p value of all participants, the Significance without TCA indicates p values when those taking TCA were omitted. | | | | | | |
| --- | --- | --- | --- | --- | --- | --- |
| **Emotion: Stress** | **NumDF** | **DenDF** | **F** | **P** | **Significance without TCA** | |
| Intervention | 1 | 507.07 | 0.26 | 0.612 | 0.182 |  |
| CPA | 1 | 99.14 | 0.04 | 0.834 | 0.866 |  |
| Timepoint | 2 | 488.43 | 118.91 | 0.000 | 0.000 | *** |
| Group | 1 | 98.76 | 38.23 | 0.000 | 0.000 | *** |
| Sex | 1 | 97.56 | 0.37 | 0.544 | 0.777 |  |
| Age | 1 | 98.05 | 1.71 | 0.194 | 0.196 |  |
| Testday | 1 | 514.22 | 2.63 | 0.106 | 0.455 |  |
| Stimulation Intensity | 1 | 582.60 | 0.18 | 0.671 | 0.304 |  |
| Intervention:CPA | 1 | 503.32 | 2.95 | 0.086 | 0.024 | * |
| Intervention:Timepoint | 2 | 488.43 | 0.93 | 0.394 | 0.366 |  |
| CPA:Timepoint | 2 | 488.43 | 2.38 | 0.094 | 0.186 |  |
| Intervention:CPA:Timepoint | 2 | 488.43 | 0.14 | 0.874 | 0.842 |  |
| **Emotion: Negative Composite Score** | |  |  |  |  |  |
| Intervention | 1 | 501.94 | 1.70 | 0.192 | 0.576 |  |
| CPA | 1 | 100.11 | 0.86 | 0.356 | 0.351 |  |
| Timepoint | 2 | 489.59 | 100.59 | 0.000 | 0.000 | *** |
| Group | 1 | 99.89 | 58.71 | 0.000 | 0.000 | *** |
| Sex | 1 | 99.10 | 3.38 | 0.069 | 0.113 |  |
| Age | 1 | 99.43 | 2.94 | 0.090 | 0.124 |  |
| Testday | 1 | 507.25 | 3.14 | 0.077 | 0.314 |  |
| Stimulation Intensity | 1 | 584.90 | 0.01 | 0.903 | 0.482 |  |
| Intervention:CPA | 1 | 499.41 | 0.57 | 0.450 | 0.227 |  |
| Intervention:Timepoint | 2 | 489.59 | 1.48 | 0.228 | 0.232 |  |
| CPA:Timepoint | 2 | 489.59 | 2.32 | 0.099 | 0.191 |  |
| Intervention:CPA:Timepoint | 2 | 489.59 | 0.54 | 0.584 | 0.576 |  |
| **Emotion: Positive Composite Score** | |  |  |  |  |  |
| Intervention | 1 | 501.51 | 1.08 | 0.300 | 0.808 |  |
| CPA | 1 | 101.63 | 0.00 | 0.973 | 0.913 |  |
| Timepoint | 2 | 491.16 | 10.24 | 0.000 | 0.000 | *** |
| Group | 1 | 101.44 | 98.68 | 0.000 | 0.000 | *** |
| Sex | 1 | 506.09 | 10.68 | 0.001 | 0.644 |  |
| Age | 1 | 101.05 | 0.96 | 0.329 | 0.404 |  |
| Testday | 1 | 100.77 | 0.52 | 0.473 | 0.016 | * |
| Stimulation Intensity | 1 | 576.94 | 0.80 | 0.372 | 0.800 |  |
| Intervention:CPA | 1 | 499.38 | 2.01 | 0.157 | 0.340 |  |
| Intervention:Timepoint | 2 | 491.16 | 0.14 | 0.874 | 0.855 |  |
| CPA:Timepoint | 2 | 491.16 | 2.32 | 0.099 | 0.060 | # |
| Intervention:CPA:Timepoint | 2 | 491.16 | 0.04 | 0.960 | 0.929 |  |

| **Emotions when RMSSD during sham stimulation was used as CPA (i.e., as continuous variable)** | | | | | | |  | | | |  |
| --- | --- | --- | --- | --- | --- | --- | --- | --- | --- | --- | --- |
| **Supplementary Table 3B. Fixed Effects of lmer for Emotions in Type-III Anova Table.** Significance Values: ***<0.001, **<0.01, *<0.05, #<0.1**.** Formula: Emotion [transformed] ~ Intervention*CPA*Timepoint+ Group+ Sex+ Age+ Testday+ Intensity+ (1| ID)**.** Significance indicates the p value of all participants, the Significance without TCA indicates p values when those taking TCA were omitted. | | | | | | | | | | |  |
| **Stressed** |  | **NumDF** | **DenDF** | **F** | **P value** | **Significance without TCA** | | |  | |
| Intervention |  | 1 | 496.4 | 2.7728 | 0.097 | 0.006 | | | ** | |
| CPA |  | 1 | 98.86 | 1.5372 | 0.218 | 0.264 | | |  | |
| Timepoint |  | 2 | 488.51 | 23.4079 | < 0.001 | 0.000 | | | *** | |
| Group |  | 1 | 98.91 | 38.1096 | < 0.001 | 0.000 | | | *** | |
| Sex |  | 1 | 97.58 | 0.3206 | 0.573 | 0.789 | | |  | |
| Age |  | 1 | 98.01 | 1.681 | 0.198 | 0.202 | | |  | |
| Testday |  | 1 | 512.49 | 1.9751 | 0.161 | 0.686 | | |  | |
| Stimulation Intensity | | 1 | 582.72 | 0.4138 | 0.520 | 0.182 | | |  | |
| Intervention:CPA | | 1 | 499.53 | 2.3805 | 0.123 | 0.020 | | | * | |
| Intervention:Timepoint | | 2 | 488.51 | 0.4513 | 0.637 | 0.590 | | |  | |
| CPA:Timepoint | | 2 | 488.44 | 0.8378 | 0.433 | 0.698 | | |  | |
| Intervention:CPA:Timepoint | point | 2 | 488.44 | 0.0355 | 0.965 | 0.947 | | |  | |
| **Negative** |  | **NumDF** | **DenDF** | **F** | **p value (Pr>F)** |  | | |  | |
| Intervention |  | 1 | 494.48 | 0.7238 | 0.395 | 0.962 | | |  | |
| CPA |  | 1 | 99.82 | 1.5299 | 0.219 | 0.219 | | |  | |
| Timepoint |  | 2 | 489.54 | 15.9787 | 0.000 | 0.000 | | | *** | |
| Group |  | 1 | 99.9 | 62.9386 | 0.000 | 0.000 | | | *** | |
| Sex |  | 1 | 99.02 | 3.1849 | 0.077 | 0.122 | | |  | |
| Age |  | 1 | 99.3 | 2.5409 | 0.114 | 0.159 | | |  | |
| Testday |  | 1 | 505.81 | 3.0099 | 0.083 | 0.362 | | |  | |
| Stimulation Intensity | | 1 | 584.45 | 0.0497 | 0.824 | 0.398 | | |  | |
| Intervention:CPA | | 1 | 496.49 | 0.0506 | 0.822 | 0.725 | | |  | |
| Intervention:Timepoint | | 2 | 489.54 | 2.3672 | 0.095 | 0.090 | | | # | |
| CPA:Timepoint | | 2 | 489.5 | 2.4973 | 0.083 | 0.177 | | |  | |
| Intervention:CPA:Timepoint | point | 2 | 489.5 | 1.0457 | 0.352 | 0.319 | | |  | |
| **Positive** |  | **NumDF** | **DenDF** | **F** | **p value (Pr>F)** |  | | |  | |
| Condition |  | 1 | 495.25 | 2.8313 | 0.093 | 0.544 | |  | |
| CPA |  | 1 | 101.43 | 0.1726 | 0.679 | 0.686 | |  | |
| Timepoint |  | 2 | 491.17 | 0.417 | 0.659 | 0.790 | |  | |
| Group |  | 1 | 101.51 | 106.3305 | < 0.001 | <0.001 | | *** | |
| Sex |  | 1 | 504.92 | 11.9776 | 0.001 | 0.640 | |  | |
| Age |  | 1 | 101 | 0.962 | 0.329 | 0.402 | |  | |
| Testday |  | 1 | 100.75 | 0.5406 | 0.464 | 0.012 | | * | |
| Stimulation Intensity | | 1 | 576.41 | 1.1841 | 0.277 | 0.695 | |  | |
| Intervention:CPA | | 1 | 496.92 | 1.5436 | 0.215 | 0.600 | |  | |
| Intervention:Timepoint | | 2 | 491.17 | 0.0552 | 0.946 | 0.961 | |  | |
| CPA:Timepoint | | 2 | 491.14 | 1.6043 | 0.202 | 0.135 | |  | |
| Intervention:CPA:Timepoint | | 2 | 491.14 | 0.0349 | 0.966 | 0.996 | |  | |

| **Supplementary Table 4A. Fixed Effects of lmer for ECG data in Type-III Anova Table.** All ECG measures were log transformed for analyses. Significance Values: ***<0.001, **<0.01, *<0.05, .<0.1. Formula: log(ECG measure) ~ Intervention*CPA*Timepoint+ Group+ Sex+ Age+ Testday+ Intensity+ (1| ID). Significance indicates the p value of all participants, the Significance without TCA indicates p values when those taking TCA were omitted. | | | | | | |
| --- | --- | --- | --- | --- | --- | --- |
| **Mean HR** | **NumDF** | **DenDF** | **F** | **p value (Pr>F)** | **Significance without TCA** | |
| Intervention | 1 | 455.64 | 0.23 | 0.633 | 0.549 |  |
| CPA | 1 | 100.69 | 6.21 | 0.014 | 0.023 | * |
| Timepoint | 2 | 444.03 | 58.66 | 0.000 | 0.000 | *** |
| Group | 1 | 100.25 | 0.04 | 0.844 | 0.951 |  |
| Sex | 1 | 99.98 | 12.36 | 0.001 | 0.000 | *** |
| Age | 1 | 100.64 | 11.28 | 0.001 | 0.001 | *** |
| Testday | 1 | 459.85 | 0.09 | 0.764 | 0.653 |  |
| Stimulation Intensity | 1 | 513.31 | 2.40 | 0.122 | 0.091 | . |
| Intervention:CPA | 1 | 453.81 | 2.41 | 0.121 | 0.108 |  |
| Intervention:Timepoint | 2 | 443.91 | 0.46 | 0.632 | 0.666 |  |
| CPA:Timepoint | 2 | 444.02 | 4.04 | 0.018 | 0.042 | * |
| Intervention:CPA:Timepoint | 2 | 443.92 | 0.17 | 0.840 | 0.808 |  |
| **RMSSD** |  |  |  |  |  |  |
| Intervention | 1 | 460.68 | 2.78 | 0.096 | 0.222 |  |
| CPA | 1 | 99.80 | 57.26 | 0.000 | 0.000 | *** |
| Timepoint | 2 | 443.40 | 27.50 | 0.000 | 0.000 | *** |
| Group | 1 | 99.10 | 0.34 | 0.562 | 0.706 |  |
| Sex | 1 | 98.72 | 1.98 | 0.162 | 0.413 |  |
| Age | 1 | 99.70 | 0.11 | 0.737 | 0.973 |  |
| Testday | 1 | 466.43 | 0.16 | 0.686 | 0.926 |  |
| Stimulation Intensity | 1 | 534.90 | 0.81 | 0.368 | 0.601 |  |
| Intervention:CPA | 1 | 458.00 | 13.49 | 0.000 | 0.000 | *** |
| Intervention:Timepoint | 2 | 443.21 | 1.81 | 0.165 | 0.190 |  |
| CPA:Timepoint | 2 | 443.38 | 6.37 | 0.002 | 0.003 | ** |
| Intervention:CPA:Timepoint | 2 | 443.21 | 0.93 | 0.395 | 0.434 |  |
| **HF-HRV** |  |  |  |  |  |  |
| Intervention | 1 | 465.46 | 1.11 | 0.292 | 0.460 |  |
| CPA | 1 | 99.77 | 48.82 | 0.000 | 0.000 | *** |
| Timepoint | 2 | 443.61 | 15.09 | 0.000 | 0.000 | *** |
| Group | 1 | 98.82 | 0.83 | 0.364 | 0.472 |  |
| Sex | 1 | 98.35 | 7.42 | 0.008 | 0.030 | * |
| Age | 1 | 99.60 | 2.73 | 0.102 | 0.169 |  |
| Testday | 1 | 472.18 | 1.78 | 0.182 | 0.347 |  |
| Stimulation Intensity | 1 | 542.75 | 1.37 | 0.242 | 0.369 |  |
| Intervention:CPA | 1 | 462.15 | 9.33 | 0.002 | 0.001 | *** |
| Intervention:Timepoint | 2 | 443.36 | 0.32 | 0.729 | 0.786 |  |
| CPA:Timepoint | 2 | 443.59 | 6.21 | 0.002 | 0.004 | ** |
| Intervention:CPA:Timepoint | 2 | 443.37 | 1.42 | 0.244 | 0.315 |  |
| **LF-HRV** |  |  |  |  |  |  |
| Intervention | 1 | 470.94 | 1.85 | 0.174 | 0.274 |  |
| CPA | 1 | 98.14 | 19.36 | 0.000 | 0.000 | *** |
| Timepoint | 2 | 442.44 | 23.45 | 0.000 | 0.000 | *** |
| Group | 1 | 96.81 | 0.70 | 0.405 | 0.461 |  |
| Sex | 1 | 96.23 | 0.40 | 0.531 | 0.188 |  |
| Age | 1 | 97.87 | 10.34 | 0.002 | 0.002 | ** |
| Testday | 1 | 478.68 | 0.75 | 0.388 | 0.586 |  |
| Stimulation Intensity | 1 | 534.25 | 1.76 | 0.185 | 0.287 |  |
| Intervention:CPA | 1 | 466.73 | 5.00 | 0.026 | 0.016 | * |
| Intervention:Timepoint | 2 | 442.09 | 3.23 | 0.041 | 0.045 | * |
| CPA:Timepoint | 2 | 442.41 | 1.69 | 0.185 | 0.161 |  |
| Intervention:CPA:Timepoint | 2 | 442.09 | 0.27 | 0.761 | 0.794 |  |
| **LF/HF ratio** |  |  |  |  |  |  |
| Intervention | 1.00 | 472.860 | 0.1183 | 0.731 | 0.720 |  |
| CPA | 1.00 | 95.700 | 12.5485 | 0.001 | 0.001 | ** |
| Timepoint | 2.00 | 440.240 | 1.9113 | 0.149 | 0.234 |  |
| Group | 1.00 | 94.150 | 0.0445 | 0.833 | 0.958 |  |
| Sex | 1.00 | 93.510 | 15.3645 | 0.000 | 0.000 | *** |
| Age | 1.00 | 95.350 | 2.4334 | 0.122 | 0.065 | . |
| Testday | 1.00 | 481.060 | 0.1716 | 0.679 | 0.717 |  |
| Stimulation Intensity | 1.00 | 518.340 | 0.0129 | 0.910 | 0.889 |  |
| Intervention:CPA | 1.00 | 468.110 | 0.63 | 0.428 | 0.416 |  |
| Intervention:Timepoint | 2.00 | 439.820 | 1.5808 | 0.207 | 0.183 |  |
| CPA:Timepoint | 2.00 | 440.190 | 2.0727 | 0.127 | 0.226 |  |
| Intervention:CPA:Timepoint | 2.00 | 439.820 | 1.8226 | 0.163 | 0.225 |  |

| **Supplementary Table 4B. Follow-Up contrasts for significant interactions of HRV (post-hoc).** All ECG measures were log transformed for analyses. Post-hoc tests on model without those taking tricyclic antidepressants. Significance Values: ***<0.001, **<0.01, *<0.05, .<0.1. Formula: log(ECG measure) ~ Intervention*CPA*Timepoint+ Group+ Sex+ Age+ Testday+ Intensity+ (1| ID)**.** BL=baseline, PS= Stress, REC=Recovery | | | | | | | |
| --- | --- | --- | --- | --- | --- | --- | --- |
| **Mean HR** |  |  |  |  |  |  |  |
| CPA:Timepoint | High CPA | BL-PS | -0.084 | 0.009 | 433.000 | -9.117 | <0.001 |
|  |  | BL-REC | -0.023 | 0.009 | 433.000 | -2.525 | 0.032 |
|  |  | PS-REC | 0.061 | 0.009 | 432.000 | 6.622 | <0.001 |
|  | Low CPA | BL-PS | -0.052 | 0.009 | 433.000 | -5.759 | <0.001 |
|  |  | BL-REC | -0.015 | 0.009 | 433.000 | -1.574 | 0.258 |
|  |  | PS-REC | 0.038 | 0.009 | 433.000 | 4.125 | 0.000 |
| **RMSSD** |  |  |  |  |  |  |  |
| CPA:Timepoint | High CPA | BL-PS | 0.272 | 0.038 | 433.000 | 7.082 | <0.001 |
|  |  | BL-REC | 0.061 | 0.038 | 434.000 | 1.590 | 0.251 |
|  |  | PS-REC | -0.211 | 0.038 | 433.000 | -5.515 | <0.001 |
|  | Low CPA | BL-PS | 0.085 | 0.038 | 433.000 | 2.233 | 0.067 |
|  |  | BL-REC | -0.030 | 0.038 | 434.000 | -0.774 | 0.719 |
|  |  | PS-REC | -0.114 | 0.038 | 433.000 | -2.983 | 0.009 |
| Intervention:CPA | High CPA | sham-tVNS | 0.122 | 0.034 | 457.000 | 3.580 | 0.000 |
|  | Low CPA | sham-tVNS | -0.064 | 0.033 | 444.000 | -1.964 | 0.050 |
| **HF-HRV** |  |  |  |  |  |  |  |
| CPA:Timepoint | High CPA | BL-PS | 0.552 | 0.089 | 434.000 | 6.197 | <0.001 |
|  |  | BL-REC | 0.256 | 0.089 | 434.000 | 2.883 | 0.012 |
|  |  | PS-REC | -0.296 | 0.089 | 433.000 | -3.334 | 0.003 |
|  | Low CPA | BL-PS | 0.133 | 0.088 | 433.000 | 1.515 | 0.285 |
|  |  | BL-REC | 0.030 | 0.089 | 434.000 | 0.338 | 0.939 |
|  |  | PS-REC | -0.103 | 0.089 | 433.000 | -1.162 | 0.477 |
| Intervention:CPA | High CPA | sham-tVNS | 0.219 | 0.079 | 463.000 | 2.786 | 0.006 |
|  | Low CPA | sham-tVNS | -0.138 | 0.075 | 447.000 | -1.835 | 0.067 |
| **LF-HRV** |  |  |  |  |  |  |  |
| Intervention:Timepoint | sham | BL-PS | 0.283 | 0.097 | 434.000 | 2.906 | 0.011 |
|  |  | BL-REC | 0.121 | 0.097 | 433.000 | 1.249 | 0.425 |
|  |  | PS-REC | -0.162 | 0.097 | 433.000 | -1.663 | 0.221 |
|  | tVNS | BL-PS | 0.566 | 0.095 | 434.000 | 5.939 | <0.001 |
|  |  | BL-REC | 0.098 | 0.096 | 436.000 | 1.014 | 0.568 |
|  |  | PS-REC | -0.468 | 0.096 | 434.000 | -4.864 | <0.001 |
| Intervention:CPA | High CPA | sham-tVNS | 0.207 | 0.085 | 470.000 | 2.423 | 0.016 |
|  | **Low CPA** | sham-tVNS | -0.076 | 0.082 | 451.000 | -0.927 | 0.354 |
| **LF/HF ratio** |  |  |  |  |  |  |  |
| no significant interaction |  |  |  |  |  |  |  |

| **HRV when RMSSD during sham stimulation was used as CPA (i.e., as continuous variable)** | | | | | | |  |  |
| --- | --- | --- | --- | --- | --- | --- | --- | --- |
| **Supplementary Table 4C. Fixed Effects of lmer for ECG data in Type-III Anova Table where CPA indicates RMSSD (baseline, sham) as continuous variable.** All ECG measures were log transformed for analyses. Significance Values: ***<0.001, **<0.01, *<0.05, #<0.1. Formula: log(ECG measure) ~ Intervention*CPA*Timepoint+ Group+ Sex+ Age+ Testday+ Intensity+ (1| ID)**.** Significance indicates the p value of all participants, the Significance without TCA indicates p values when those taking TCA were omitted. | | | | | | | | |
| **HR** | **NumDF** | **DenDF** | **F** | **p value (Pr>F)** | **Significance without TCA, continuous CPA** |  | | |
| Intervention | 1 | 450.85 | 2.9379 | 0.087 | 0.058 | # | | |
| CPA | 1 | 100.43 | 8.0488 | 0.006 | 0.014 | * | | |
| Timepoint | 2 | 443.99 | 7.2957 | 0.001 | 0.000 | *** | | |
| Group | 1 | 100.28 | 0.1295 | 0.720 | 0.807 |  | | |
| Sex | 1 | 99.89 | 13.3934 | < 0.001 | 0.000 | *** | | |
| Age | 1 | 100.41 | 9.086 | 0.003 | 0.002 | ** | | |
| Testday | 1 | 459.78 | 0.2323 | 0.630 | 0.498 |  | | |
| Stimulation Intensity | 1 | 513.28 | 3.2784 | 0.071 | 0.049 | * | | |
| Intervention:CPA | 1 | 450.82 | 2.6298 | 0.106 | 0.075 | # | | |
| Intervention:Timepoint | 2 | 443.95 | 0.4226 | 0.656 | 0.616 |  | | |
| CPA:Timepoint | 2 | 443.95 | 1.9397 | 0.145 | 0.284 |  | | |
| Intervention:CPA:Timepoint | 2 | 443.84 | 0.4226 | 0.656 | 0.608 |  | | |
| **RMSSD** | **NumDF** | **DenDF** | **F** | **p value (Pr>F)** |  |  | | |
| Intervention | 1 | 458.34 | 17.9947 | < 0.001 | 0.000 | *** | | |
| CPA | 1 | 101.3 | 124.2993 | < 0.001 | < 2.2e-16 | *** | | |
| Timepoint | 2 | 445.46 | 2.5681 | 0.078 | 0.098 | # | | |
| Group | 1 | 100.84 | 1.2309 | 0.270 | 0.330 |  | | |
| Sex | 1 | 100.14 | 1.411 | 0.238 | 0.562 |  | | |
| Age | 1 | 101.12 | 3.3114 | 0.072 | 0.126 |  | | |
| Testday | 1 | 472.87 | 0.0312 | 0.860 | 0.355 |  | | |
| Stimulation Intensity | 1 | 542.4 | 0.0684 | 0.794 | 0.733 |  | | |
| Intervention:CPA | 1 | 458.38 | 32.5119 | < 0.001 | 0.000 | *** | | |
| Intervention:Timepoint | 2 | 445.37 | 1.1901 | 0.305 | 0.362 |  | | |
| CPA:Timepoint | 2 | 445.41 | 16.6586 | < 0.001 | 0.000 | *** | | |
| Intervention:CPA:Timepoint | 2 | 445.19 | 0.1216 | 0.886 | 0.905 |  | | |
| **HF-HRV** | **NumDF** | **DenDF** | **F** | **p value (Pr>F)** |  |  | | |
| Intervention | 1 | 460.89 | 13.4654 | < 0.001 | < 0.001 | *** | | |
| CPA | 1 | 101.45 | 87.8813 | < 0.001 | < 0.001 | *** | | |
| Timepoint | 2 | 445.85 | 1.4415 | 0.238 | 0.237 |  | | |
| Group | 1 | 100.83 | 2.1203 | 0.148 | 0.186 |  | | |
| Sex | 1 | 100.04 | 7.0896 | 0.009 | 0.034 | * | | |
| Age | 1 | 101.18 | 9.6693 | 0.002 | 0.004 | ** | | |
| Testday | 1 | 476.95 | 0.7396 | 0.390 | 0.789 |  | | |
| Stimulation Intensity | 1 | 542.1 | 0.3825 | 0.537 | 0.868 |  | | |
| Intervention:CPA | 1 | 460.98 | 21.855 | < 0.001 | < 0.001 | *** | | |
| Intervention:Timepoint | 2 | 445.75 | 1.1881 | 0.306 | 0.412 |  | | |
| CPA:Timepoint | 2 | 445.81 | 13.7817 | < 0.001 | < 0.001 | *** | | |
| Intervention:CPA:Timepoint | 2 | 445.55 | 0.752 | 0.472 | 0.550 |  | | |
| **LF-HRV** | **NumDF** | **DenDF** | **F** | **p value (Pr>F)** |  |  | | |
| Intervention | 1.0 | 460.89 | 0.3828 | 0.536 | 0.355 |  | | |
| CPA | 1.0 | 97.61 | 27.2764 | 0.000 | < 0.001 | *** | | |
| Timepoint | 2.0 | 442.41 | 3.0944 | 0.046 | 0.130 | ns | | |
| Group | 1.0 | 96.76 | 1.2539 | 0.266 | 0.285 |  | | |
| Sex | 1.0 | 95.89 | 0.7382 | 0.392 | 0.136 |  | | |
| Age | 1.0 | 97.2 | 15.9767 | 0.000 | < 0.001 | *** | | |
| Testday | 1.0 | 479.22 | 0.5448 | 0.461 | 0.704 |  | | |
| Stimulation Intensity | 1.0 | 532.13 | 0.7272 | 0.394 | 0.588 |  | | |
| Intervention:CPA | 1.0 | 461.07 | 1.8515 | 0.174 | 0.122 | ns | | |
| Intervention:Timepoint | 2.0 | 442.27 | 0.1761 | 0.839 | 0.895 |  | | |
| CPA:Timepoint | 2.0 | 442.38 | 3.9605 | 0.020 | 0.010 | * | | |
| Intervention:CPA:Timepoint | 2.0 | 442.05 | 0.6485 | 0.523 | 0.508 |  | | |
| **LF/HF-ratio** |  |  |  |  |  |  | | |
| Intervention | 1.000 | 463.160 | 7.668 | 0.006 | 0.004 | ** | | |
| CPA | 1.000 | 96.250 | 20.608 | 0.000 | < 0.001 | *** | | |
| Timepoint | 2.000 | 441.450 | 6.734 | 0.001 | 0.005 | ** | | |
| Group | 1.000 | 95.130 | 0.164 | 0.687 | 0.797 |  | | |
| Sex | 1.000 | 94.160 | 15.426 | 0.000 | < 0.001 | *** | | |
| Age | 1.000 | 95.660 | 1.071 | 0.303 | 0.188 |  | | |
| Testday | 1.000 | 483.040 | 0.006 | 0.938 | 0.921 |  | | |
| Stimulation Intensity | 1.000 | 511.440 | 0.109 | 0.741 | 0.678 |  | | |
| Intervention:CPA | 1.000 | 463.450 | 8.480 | 0.004 | 0.002 | ** | | |
| Intervention:Timepoint | 2.000 | 441.280 | 0.772 | 0.463 | 0.572 |  | | |
| CPA:Timepoint | 2.000 | 441.450 | 4.523 | 0.011 | 0.024 | * | | |
| Intervention:CPA:Timepoint | 2.000 | 441.040 | 2.435 | 0.089 | 0.108 |  | | |

| **Supplementary Table 5A. Fixed Effects of lmer for Inflammation data in Type-III Anova Table.** All Cytokines were transformed with a Tukey ladder of power transformations for analyses. Significance Values: ***<0.001, **<0.01, *<0.05, .<0.1 Formula: Cytokine [transformed] ~ Intervention*CPA*Timepoint+ Group+ Sex+ Age+ Testday+ Intensity+ (1| ID). Significance without TCA indicates p values when those taking TCA were omitted. | | | | | |
| --- | --- | --- | --- | --- | --- |
| **TNF-α[log]** | **NumDF** | **DenDF** | **F** | **Significance** | **Significance no TCA** |
| Intervention | 1 | 233.538 | 1.3436 | 0.248 | 0.324 |
| CPA | 1 | 78.412 | 0.4278 | 0.515 | 0.552 |
| Timepoint | 1 | 226.329 | 0.8343 | 0.362 | 0.403 |
| Group | 1 | 78.252 | 4.119 | **0.046** | **0.047** |
| Sex | 1 | 77.278 | 0.0011 | 0.974 | 0.948 |
| Age | 1 | 78.431 | 2.3276 | 0.131 | 0.128 |
| Testday | 1 | 234.166 | 0.3812 | 0.538 | 0.648 |
| Stimulation Intensity | 1 | 281.034 | 1.4165 | 0.235 | 0.300 |
| Intervention:CPA | 1 | 231.801 | 4.3627 | **0.038** | **0.038** |
| Intervention:Timepoint | 1 | 226.334 | 0.0415 | 0.839 | 0.876 |
| CPA:Timepoint | 1 | 226.302 | 0.3109 | 0.578 | 0.557 |
| Intervention:CPA:Timepoint | 1 | 226.302 | 0.0712 | 0.790 | 0.826 |
| **IL-6[log]** |  |  |  |  |  |
| Intervention | 1 | 241.925 | 1.6682 | 0.198 | 0.282 |
| CPA | 1 | 81.504 | 0.0965 | 0.757 | 0.787 |
| Timepoint | 1 | 237.435 | 2.0809 | 0.151 | 0.160 |
| Group | 1 | 81.055 | 0 | 1.000 | 0.982 |
| Sex | 1 | 80.725 | 0.751 | 0.389 | 0.396 |
| Age | 1 | 81.561 | 0.1094 | 0.742 | 0.816 |
| Testday | 1 | 242.454 | 0.9188 | 0.339 | 0.471 |
| Stimulation Intensity | 1 | 274.112 | 0.8965 | 0.345 | 0.453 |
| Intervention:CPA | 1 | 240.44 | 0.5252 | 0.469 | 0.422 |
| Intervention:Timepoint | 1 | 237.413 | 0.1214 | 0.728 | 0.606 |
| CPA:Timepoint | 1 | 237.424 | 0.1343 | 0.714 | 0.728 |
| Intervention:CPA:Timepoint | 1 | 237.428 | 0.0187 | 0.891 | 0.964 |

| **Inflammation when RMSSD during sham was used as CPA (i.e., as continuous variable)** | | | | | |  | |
| --- | --- | --- | --- | --- | --- | --- | --- |
| **Supplementary Table 5B. Fixed Effects of lmer for Inflammation data in Type-III Anova Table where CPA indicates RMSSD (baseline, sham) as continuous variable.** All Cytokines were transformed with a Tukey ladder of power transformations for analyses. Significance Values: ***<0.001, **<0.01, *<0.05, #<0.1. Formula: Cytokine [transformed] ~ Intervention*CPA*Timepoint+ Group+ Sex+ Age+ Testday+ Intensity+ (1| ID)**.** Significance indicates the p value of all participants; the Significance without TCA indicates p values when those taking TCA were omitted. | | | | | | | |
| **TNF-α[transformed]** | **NumDF** | **DenDF** | **F** | **P value** | **Significance without TCA, continuous CPA** | |  |
| Intervention | 1 | 228.878 | 0.3874 | 0.53429 | 0.459 | |  |
| CPA | 1 | 80.239 | 2.5785 | 0.11225 | 0.128 | |  |
| Timepoint | 1 | 226.411 | 0.0332 | 0.85555 | 0.948 | |  |
| Group | 1 | 78.484 | 5.18 | 0.02558 | 0.028 | | * |
| Sex | 1 | 77.037 | 0.0241 | 0.87709 | 0.926 | |  |
| Age | 1 | 78.472 | 2.2409 | 0.13841 | 0.142 | |  |
| Testday | 1 | 232.669 | 0.0912 | 0.76297 | 0.893 | |  |
| Stimulation Intensity | 1 | 281.002 | 0.7109 | 0.39986 | 0.492 | |  |
| Intervention:CPA | 1 | 230.686 | 1.4377 | 0.23174 | 0.209 | |  |
| Intervention:Timepoint | 1 | 226.54 | 0.5312 | 0.46687 | 0.506 | |  |
| CPA:Timepoint | 1 | 226.673 | 0.1082 | 0.74255 | 0.678 | |  |
| Intervention:CPA:Timepoint | 1 | 226.77 | 0.5269 | 0.46868 | 0.490 | |  |
| **IL6 [transformed]** | **NumDF** | **DenDF** | **F** | **p value (Pr>F)** | |  | | --- | | |  |
| Intervention | 1 | 238.666 | 0.0762 | 0.78274 | 0.524 | |  |
| CPA | 1 | 83.959 | 0.1537 | 0.69602 | 0.636 | |  |
| Timepoint | 1 | 238.148 | 3.4146 | 0.06586 | 0.073 | | # |
| Group | 1 | 81.287 | 0.028 | 0.86758 | 0.890 | |  |
| Sex | 1 | 80.607 | 0.6736 | 0.41424 | 0.415 | |  |
| Age | 1 | 81.517 | 0.1384 | 0.71083 | 0.796 | |  |
| Testday | 1 | 241.79 | 0.6855 | 0.40851 | 0.609 | |  |
| Stimulation Intensity | 1 | 272.564 | 0.7254 | 0.39512 | 0.556 | |  |
| Intervention:CPA | 1 | 239.667 | 1.1268 | 0.28953 | 0.186 | |  |
| Intervention:Timepoint | 1 | 238.153 | 0.2168 | 0.6419 | 0.412 | |  |
| CPA:Timepoint | 1 | 239.1 | 1.5479 | 0.21466 | 0.221 | |  |
| Intervention:CPA:Timepoint | 1 | 239.107 | 0.1053 | 0.74587 | 0.532 | |  |
